# Supplementary material
Source: PubMed Central journal article supplement (PMC11197145)
Supplement: sj-pdf-1-jcb-10.1177_0271678X231201472.pdf [file sj-pdf-1-jcb-10.1177_0271678X231201472.pdf]

**Supplementary Table 1. Cerebrovascular and Peripheral Responses during an Acute bout of HIIT and Recovery**

|               | MCAv                        |                               |               | MAP      |          | Peak HR<br>(% Age-Predicted) |           | P <sub>ET</sub> CO <sub>2</sub> |        | RR     |        |
|---------------|-----------------------------|-------------------------------|---------------|----------|----------|------------------------------|-----------|---------------------------------|--------|--------|--------|
|               | Stroke<br>(Ipsi-)<br>(n=24) | Stroke<br>(Contra-)<br>(n=20) | CON<br>(n=25) | Stroke   | CON      | Stroke                       | CON       | Stroke                          | CON    | Stroke | CON    |
|               | <b>Baseline</b>             | 41 ± 11                       | 46 ± 9        | 49 ± 13  | 82 ± 12  | 80 ± 11                      | 49% ± 8%  | 41% ± 7%                        | 36 ± 4 | 36 ± 4 | 14 ± 4 |
| <b>HIIT</b>   |                             |                               |               |          |          |                              |           |                                 |        |        |        |
| Minute 1 (R)  | 45 ± 12                     | 50 ± 10                       | 53 ± 14       | 86 ± 10  | 87 ± 10  | 62% ± 10%                    | 52% ± 8%  | 36 ± 5                          | 36 ± 4 | 22 ± 5 | 22 ± 4 |
| Minute 2 (H)  | 47 ± 12                     | 53 ± 11                       | 57 ± 16       | 95 ± 12  | 98 ± 13  | 69% ± 10%                    | 67% ± 8%  | 38 ± 6                          | 39 ± 4 | 25 ± 6 | 24 ± 3 |
| Minute 3 (R)  | 48 ± 13                     | 54 ± 12                       | 60 ± 19       | 95 ± 13  | 96 ± 13  | 68% ± 10%                    | 60% ± 9%  | 39 ± 7                          | 43 ± 4 | 24 ± 6 | 23 ± 3 |
| Minute 4 (H)  | 48 ± 13                     | 54 ± 12                       | 59 ± 17       | 103 ± 13 | 106 ± 16 | 73% ± 10%                    | 70% ± 9%  | 38 ± 6                          | 41 ± 4 | 26 ± 7 | 25 ± 3 |
| Minute 5 (R)  | 48 ± 13                     | 54 ± 13                       | 58 ± 17       | 98 ± 14  | 100 ± 15 | 70% ± 10%                    | 62% ± 10% | 39 ± 6                          | 42 ± 4 | 25 ± 7 | 23 ± 3 |
| Minute 6 (H)  | 47 ± 13                     | 53 ± 12                       | 58 ± 17       | 101 ± 14 | 107 ± 15 | 76% ± 11%                    | 72% ± 10% | 38 ± 6                          | 40 ± 4 | 26 ± 7 | 25 ± 3 |
| Minute 7 (R)  | 46 ± 12                     | 52 ± 12                       | 56 ± 17       | 98 ± 13  | 99 ± 15  | 73% ± 12%                    | 64% ± 10% | 38 ± 6                          | 41 ± 4 | 26 ± 8 | 24 ± 3 |
| Minute 8 (H)  | 46 ± 12                     | 51 ± 12                       | 56 ± 16       | 101 ± 12 | 105 ± 17 | 77% ± 10%                    | 74% ± 9%  | 37 ± 5                          | 39 ± 4 | 28 ± 8 | 26 ± 3 |
| Minute 9 (R)  | 45 ± 12                     | 50 ± 12                       | 55 ± 16       | 96 ± 13  | 99 ± 16  | 73% ± 11%                    | 66% ± 10% | 38 ± 5                          | 40 ± 5 | 27 ± 8 | 25 ± 3 |
| Minute 10 (H) | 45 ± 12                     | 50 ± 12                       | 54 ± 16       | 98 ± 13  | 103 ± 17 | 78% ± 10%                    | 75% ± 9%  | 37 ± 5                          | 39 ± 4 | 28 ± 7 | 27 ± 3 |

**Immediately**     $40 \pm 10$      $44 \pm 10$      $48 \pm 13$      $76 \pm 11$      $78 \pm 10$      $57\% \pm 7\%$      $51\% \pm 6\%$      $35 \pm 5$      $36 \pm 4$      $18 \pm 5$      $18 \pm 2$

**Post**

**30-Minutes**     $42 \pm 11$      $46 \pm 9$      $50 \pm 14$      $81 \pm 10$      $84 \pm 12$      $53\% \pm 8\%$      $46\% \pm 7\%$      $35 \pm 4$      $34 \pm 3$      $14 \pm 3$      $15 \pm 3$

**Post**

---

Means  $\pm$  SD. MCA<sub>v</sub> = middle cerebral artery blood velocity. MAP = mean arterial pressure. HR = heart rate. P<sub>ET</sub>CO<sub>2</sub> = expired end tidal carbon dioxide. RR = respiratory rate. R = active recovery. H = high-intensity.

---
